# Supplementary material for: When is birthweight at term abnormally low? A systematic review and meta-analysis of the association and predictive ability of current birthweight standards for neonatal outcomes
Source: PubMed Central journal article supplement — BJOG. 2014 Jan 8;121(5):515–26. doi: 10.1111/1471-0528.12517 (PMC4162997; doi:10.1111/1471-0528.12517), 2014-01-08
Supplement: bjo0121-0515-SD1.pdf [file bjo0121-0515-SD1.pdf]

**Table S1.** List of included studies in systematic review of birth weight standards and neonatal outcomes

| Author, Year and Country                              | Population                                                                                                                                                                                | Method of defining gestational age                                                         | Birth weight parameter                                                                        | Outcome Measure                                                                                                      | Total number of neonates | Number with specified outcome |
|-------------------------------------------------------|-------------------------------------------------------------------------------------------------------------------------------------------------------------------------------------------|--------------------------------------------------------------------------------------------|-----------------------------------------------------------------------------------------------|----------------------------------------------------------------------------------------------------------------------|--------------------------|-------------------------------|
| Als et al 1976 <sup>35</sup><br>USA                   | Unclear if singleton/<br>mixed<br>Infants with IUGR<br>and same number of<br>control infants<br>Year of birth<br>No congenital<br>anomalies included<br>Ethnicity: all<br>Caucasian       | LMP and<br>Dubowitz<br>method                                                              | Ponderal Index <2.25                                                                          | Brazelton motor score (10<br>days old), below average 3                                                              | 20                       | 4                             |
| Ananth and<br>Vintzelios<br>2009 <sup>36</sup><br>USA | Singleton<br>General population<br>in USA during study<br>period<br>Year of birth 1995-<br>2004<br>Congenital anomaly<br>excluded<br>Ethnicity 77.4%<br>white, 17.5%<br>black, 5.2% other | Clinical<br>estimate<br>(combination of<br>USS, obstetrical<br>and newborn<br>examination) | Population chart <10 <sup>th</sup><br>centile<br>(internal chart based<br>on this population) | Neonatal death (28 days,<br>from national<br>dataset)[10,785]                                                        | 18,169,349               | 10,785                        |
| Arora, Paul and<br>Singh 1987 <sup>37</sup><br>India  | Unclear if singleton/<br>mixed<br>Consecutive hospital<br>born infants with<br>IUGR and same<br>number of control<br>infants<br>Year of birth 1984-                                       | Unreported                                                                                 | Population chart <10 <sup>th</sup><br>centile<br>(Singh chart)                                | 1. Neonatal mortality<br>(precise age<br>unclear)<br>2. Neonatal<br>hypoglycaemia<br>≤30mg/dL (2-20<br>hours of age) | 200                      | 1. 3<br>2. 12                 |

|                                                            |                                                                                                                                                                                                                                                    |                                                                  |                                                                                                                                 |                                                                        |        |                         |
|------------------------------------------------------------|----------------------------------------------------------------------------------------------------------------------------------------------------------------------------------------------------------------------------------------------------|------------------------------------------------------------------|---------------------------------------------------------------------------------------------------------------------------------|------------------------------------------------------------------------|--------|-------------------------|
| Balcazar and Haas 1990 <sup>38</sup><br>Mexico             | 1985<br>Congenital anomaly<br>NOT excluded<br>Ethnicity unreported<br>Singleton<br>Infants born to women of low social class at a mother and child centre<br>Year of birth 1981-1983<br>Congenital anomaly<br>NOT excluded<br>Ethnicity unreported | LMP                                                              | 1.Population chart < 10 <sup>th</sup> centile(Lubchenco chart)<br>2.Birth weight <2.9kg                                         | Neonatal death (72 hours)                                              | 9201   | 43                      |
| Bhargava, Sachdev and Ghosh 1985 <sup>39</sup><br>India    | Singleton<br>Hospital population, consecutive births<br>Year of birth unreported<br>No exclusions specified<br>Ethnicity unreported                                                                                                                | LMP, confirmed by neonatal physical and neurological examination | 1 Birth weight > -1 Standard Deviation (from population mean)<br>2. Birth weight> -2 Standard deviations (from population mean) | Neonatal mortality (7 days)                                            | 15,596 | 212                     |
| De Almeida and de Mello Jorge 1998 <sup>40</sup><br>Brazil | Hospital population (11 centres)<br>Year of birth 1992<br>Singleton<br>Excluded if gestational age unknown<br>Ethnicity unreported                                                                                                                 | LMP                                                              | Population chart <10th percentile (Lubchenco chart)                                                                             | Neonatal death (28 days)                                               | 2024   | 13                      |
| Doctor et al 2001 <sup>41</sup><br>USA                     | Hospital population<br>Year of birth 1997<br>Mixed singleton and                                                                                                                                                                                   | Second trimester ultrasound scan                                 | Population chart <10th percentile (Alexander et al reference chart)                                                             | 1.Neonatal intubation required (at birth)<br>2.Neonatal intensive care | 744    | 1. 14<br>2. 41<br>3. 22 |

|                                            |                                                                                                                                                                                                                                                                      |                        |                                                                                                                                                                                                                                                                                         |                                                                                                                                                                                                                                                                                                                                                                                             |         |                |
|--------------------------------------------|----------------------------------------------------------------------------------------------------------------------------------------------------------------------------------------------------------------------------------------------------------------------|------------------------|-----------------------------------------------------------------------------------------------------------------------------------------------------------------------------------------------------------------------------------------------------------------------------------------|---------------------------------------------------------------------------------------------------------------------------------------------------------------------------------------------------------------------------------------------------------------------------------------------------------------------------------------------------------------------------------------------|---------|----------------|
|                                            | multiple pregnancy<br>Infants with birth weight < 10 <sup>th</sup> percentile, and matched controls birth weight 10 <sup>th</sup> -90 <sup>th</sup> percentile<br>Excluded if gestational age unreliable<br>Ethnicity: 38% Caucasian, 60% African American, 2% other |                        | Population chart <5 <sup>th</sup> percentile (Alexander et al reference chart)                                                                                                                                                                                                          | unit admission required (neonatal)<br>3. Respiratory distress (transient tachypnoea requiring oxygen RR>60/min for more than 4 hours/pneumonia clinical and radiological/meconium aspiration with supportive radiology (neonatal)<br>4. Hypoglycaemia (blood glucose < 40mg/dL and symptoms- jittery/ tachypnoeic/hypothermic ) (neonatal)<br>5. Seizures (threshold unreported) (neonatal) |         | 4. 22<br>5. 3  |
| Ferdynus et al 2009 <sup>7</sup><br>France | Births in the Burgundy region from 2000 to 2006<br>Singleton<br>Chromosomal anomalies excluded<br>Ethnicity not reported                                                                                                                                             | LMP and early USS      | 1. Population chart <10 <sup>th</sup> percentile (based on whole study population)<br>2. 'Healthy population' chart <10 <sup>th</sup> percentile (excluding maternal diabetes, hypertension, pre-eclampsia/eclampsia, abruption placentae, placenta praevia, presumed chorioamnionitis) | 1. Neonatal mortality (death during hospital stay)<br>2. HIE (definition not specified) (neonatal)                                                                                                                                                                                                                                                                                          | 121,312 | 1. 61<br>2. 53 |
| Figueras et al 2007 <sup>28</sup>          | Hospital population<br>Year of birth 2001-                                                                                                                                                                                                                           | Early second trimester | 1. Population chart <10 <sup>th</sup> percentile                                                                                                                                                                                                                                        | 1. Neurological morbidity (Seizures, IVH> grade 2,                                                                                                                                                                                                                                                                                                                                          | 12,705  | 1. 56<br>2. 15 |

|                                              |                                                                                                                                                                                                                                   |            |                                                                                                                                                               |                                                                                                                                                                                                                        |         |                          |
|----------------------------------------------|-----------------------------------------------------------------------------------------------------------------------------------------------------------------------------------------------------------------------------------|------------|---------------------------------------------------------------------------------------------------------------------------------------------------------------|------------------------------------------------------------------------------------------------------------------------------------------------------------------------------------------------------------------------|---------|--------------------------|
| Spain                                        | 2005<br>Singleton<br>Congenital and<br>chromosomal<br>anomalies excluded<br>58% multiparous<br>mothers<br>Ethnicity: 73.9%<br>White, 4.6% South<br>East Asian, 2.3%<br>Central African,<br>18.2% South<br>American, Other<br>0.9% | ultrasound | (Santamaria Spanish<br>population chart)<br>2. Customised centile<br>chart <10 <sup>th</sup> percentile<br>(Gardosi et al)                                    | PVL, HIE or abnormal EEG<br>(neonatal)<br>2. Non-neurological<br>morbidity (NICU stay > 10<br>days, NEC (Walsh criteria),<br>renal failure (SCr > 132.6<br>µmol/l / 1.5mg/dl), cardiac<br>failure (need for inotropes) |         |                          |
| Glinianaia et al<br>2010 <sup>31</sup><br>UK | All singleton births<br>in Newcastle upon<br>Tyne 1961-2000<br>Excluded individuals<br>with missing data<br>(congenital<br>anomalies not<br>excluded)<br>Ethnicity unreported                                                     | Unreported | 1. Birth weight <2.5kg<br>2. Birth weight <1.5kg                                                                                                              | Neonatal death (28 days)                                                                                                                                                                                               | 107,461 | 350                      |
| Gouyon et al<br>2003 <sup>42</sup><br>France | General population,<br>all live full term<br>births in Burgundy<br>region<br>Year of birth 2000-<br>2001<br>Ethnicity unreported<br>Not specified if<br>singleton/ multiple                                                       | Unreported | 1. Population chart<br><10 <sup>th</sup> percentile<br>(French growth curves)<br>2. Population chart<br><3 <sup>rd</sup> percentile (French<br>growth curves) | 1. Severe neurological<br>disorders (threshold<br>unreported) (neonatal)<br>2. Respiratory distress<br>syndrome (threshold<br>unreported) (neonatal)<br>3. Neonatal death                                              | 30,334  | 1. 49<br>2. 197<br>3. 25 |

|                                                              |                                                                                                                                                                                                                                                                       |                                                                                           |                                                                                                                      |                                 |        |      |
|--------------------------------------------------------------|-----------------------------------------------------------------------------------------------------------------------------------------------------------------------------------------------------------------------------------------------------------------------|-------------------------------------------------------------------------------------------|----------------------------------------------------------------------------------------------------------------------|---------------------------------|--------|------|
| Gray et al<br>1991 <sup>43</sup><br>Brazil                   | births<br>No exclusions reported<br>Hospital and maternity unit population (5 centres) All low birth weight infants and control group (selection method unclear)<br>Year of birth 1984-1986<br>Singleton<br>Congenital anomalies not excluded<br>Ethnicity unreported | Capurro method                                                                            | Birth weight <2.5kg                                                                                                  | 1. Early neonatal death (7days) | 2977   | 43   |
| Haas, Balcazar and Caulfield<br>1987 <sup>54</sup><br>Mexico | 2 maternity hospitals, one serving lower socioeconomic class, one mixed population.<br>Year of birth 1981-1984<br>Excluded outliers <500g or > 5500g, length <40 cm or > 56cm.<br>Ethnicity Latin American                                                            | Classified by neonatal clinical examination as term or preterm, LMP addition if available | 1.Population chart <10 <sup>th</sup> percentile (Brandt)<br>2.Rohrer's Index (wt (g) x100/length (cm) <sup>3</sup> ) | Early neonatal death (48 hours) | 16,321 | 77   |
| Kramer et al                                                 | Hospital born                                                                                                                                                                                                                                                         | USS BPD 16-18                                                                             | 1.Fetal growth ratio                                                                                                 | 1.Neonatal death (in            | 5305   | 1. 3 |

|                                                        |                                                                                                                                                                                                                                                                                                 |                       |                                                                                                                                                                                                                             |                                                                                           |         |       |
|--------------------------------------------------------|-------------------------------------------------------------------------------------------------------------------------------------------------------------------------------------------------------------------------------------------------------------------------------------------------|-----------------------|-----------------------------------------------------------------------------------------------------------------------------------------------------------------------------------------------------------------------------|-------------------------------------------------------------------------------------------|---------|-------|
| 1990 <sup>44</sup><br>Canada                           | infants at single centre.<br>Year of birth 1980-1986<br>Singleton<br>Excluded congenital anomalies, chromosomal anomalies and evidence of intrauterine infection<br>Ethnicity unreported                                                                                                        | weeks gestation + LMP | <0.75 (observed birth weight/ mean birth weight for gestational age for this hospital population)<br>2. Fetal growth ratio <0.80(observed birth weight/ mean birth weight for gestational age for this hospital population) | hospital, age range unspecified)<br>2. Hypoglycaemia (plasma glucose <40mg/dL) (neonatal) |         | 2. 37 |
| Lubchenco, Searls and Brazie 1972 <sup>45</sup><br>USA | All live born infants at single university centre during the study period, with adequate information on gestational age<br>Year of birth: 1958 to 1968<br>Mixed singleton/ multiple birth<br>No exclusions reported<br>Ethnicity 55% Anglo-American, 30% Mexican American, 15% African American | Unreported            | 1.Birth weight <2.5kg<br>2.Birth weight <2.0kg                                                                                                                                                                              | Neonatal death (28days)                                                                   | 11,197  | 58    |
| Mardones et al 2008 <sup>46</sup>                      | Live births and neonatal death                                                                                                                                                                                                                                                                  | LMP, USS before 20    | 1. Birth weight <2.5kg<br>2. Birth weight <1.5kg                                                                                                                                                                            | Neonatal death (28 days)                                                                  | 216,315 | 380   |

|                                       |                                                                                                                                                                                                                                                                                                                                                                                                                  |                                                                                                      |                                                                 |                               |                               |                         |
|---------------------------------------|------------------------------------------------------------------------------------------------------------------------------------------------------------------------------------------------------------------------------------------------------------------------------------------------------------------------------------------------------------------------------------------------------------------|------------------------------------------------------------------------------------------------------|-----------------------------------------------------------------|-------------------------------|-------------------------------|-------------------------|
| Chile                                 | information from Chilean Civil Registry service<br>Year of birth: 2000<br>Mixed singleton and multiple births<br>Excluded if data incomplete<br>Ethnicity unreported                                                                                                                                                                                                                                             | weeks, postnatal clinical examination.<br>Majority have USS dating but exact no not reported         |                                                                 |                               |                               |                         |
| Matijasevich et al 2008 <sup>33</sup> | Three separate birth cohorts in city of Pelotas. Maternity wards visited on daily basis and mothers interviewed.<br>Perinatal mortality surveillance: visiting maternity wards, intermediate care centres, registry offices and cemeteries<br>Year of birth : 1982, 1993, 2004<br>Mixed singleton and multiple births<br>Excluded if gestational age incompatible with birth weight.<br>Congenital anomalies not | LMP, in 1993 and 2004<br>Dubowitz score also used, in 2004 large number also had early pregnancy USS | Population chart < 10 <sup>th</sup> percentile (Williams curve) | Early neonatal death (7 days) | 1. 4130<br>2. 4171<br>3. 3392 | 1. 35<br>2. 13<br>3. 10 |
| Brazil                                |                                                                                                                                                                                                                                                                                                                                                                                                                  |                                                                                                      |                                                                 |                               |                               |                         |

|                                                     |                                                                                                                                                                                                                                                                                                                          |                                                                                  |                                                                                                                                                                                                                 |                                                                                              |         |                 |
|-----------------------------------------------------|--------------------------------------------------------------------------------------------------------------------------------------------------------------------------------------------------------------------------------------------------------------------------------------------------------------------------|----------------------------------------------------------------------------------|-----------------------------------------------------------------------------------------------------------------------------------------------------------------------------------------------------------------|----------------------------------------------------------------------------------------------|---------|-----------------|
|                                                     | excluded.<br>Ethnicity unreported                                                                                                                                                                                                                                                                                        |                                                                                  |                                                                                                                                                                                                                 |                                                                                              |         |                 |
| McIntire et al<br>1999 <sup>47</sup><br>USA         | Live births at single hospital during study period.<br>Outcomes abstracted from medical records, birth information prospective database.<br>Year of birth 1988-1996<br>Singleton<br>Congenital anomalies excluded, and birth weight >75 <sup>th</sup> centile<br>Ethnicity: 54% Hispanic, 28% black, 15% white, 3% other | LMP, if fundal height discrepancy (18-30 weeks gestation) > 2cm confirmed by USS | 1. Population chart ≤ 10 <sup>th</sup> percentile (this population)<br>2. Population chart ≤ 5 <sup>th</sup> percentile (this population)<br>3. Population chart ≤ 3 <sup>rd</sup> percentile (this population) | 1. Neonatal death (28 days)<br>2. Seizures (definition unreported)(1 <sup>st</sup> 24 hours) | 82,361  | 1. 37<br>2. 125 |
| Melve and Skjaerven<br>2003 <sup>32</sup><br>Norway | Births in the Norwegian Medical Birth Registry, mothers with at least 2 singletons<br>Year of Birth 1967 to 1998<br>Singleton<br>No exclusions specified<br>Ethnicity unreported                                                                                                                                         | LMP                                                                              | 1. Birth weight <2.5kg<br>2. Birth weight <2.0kg<br>3. Birth weight <1.5kg                                                                                                                                      | Neonatal death (28 days)                                                                     | 527,157 | 452             |
| Minikami, Izumi                                     | Japanese Ministry of                                                                                                                                                                                                                                                                                                     | Exact numbers                                                                    | Birth weight > -1SD                                                                                                                                                                                             | Early neonatal death                                                                         | 54,802  | 132             |



|                                            |                                                                                                                                                                                                                                                                                                                                                  |                                                                                                  |                                                                                                                       |                                                                                                                                                                          |         |     |
|--------------------------------------------|--------------------------------------------------------------------------------------------------------------------------------------------------------------------------------------------------------------------------------------------------------------------------------------------------------------------------------------------------|--------------------------------------------------------------------------------------------------|-----------------------------------------------------------------------------------------------------------------------|--------------------------------------------------------------------------------------------------------------------------------------------------------------------------|---------|-----|
| and Sato 1999 <sup>29</sup><br>Japan       | Health and Welfare data regarding births and deaths<br>Year of birth: 1989-1993<br>All multiple births<br>No exclusions specified<br>Ethnicity unreported                                                                                                                                                                                        | unreported: "early USS widely practiced in Japan/ many multiple pregnancies conceived after IVF" | below mean (calculated from study population)                                                                         | (7days)                                                                                                                                                                  |         |     |
| Minior and Divon 1998 <sup>30</sup><br>USA | Cohort of SGA infants born following uncomplicated pregnancies (excluded maternal medical conditions e.g. pre-eclampsia, diabetes, renal or autoimmune disease), matched to three AGA controls<br>Year of birth 1988-1995<br>Singleton<br>Congenital or chromosomal anomalies excluded<br>Ethnicity 35% white, 31% Black, 27% Hispanic, 7% Other | Early USS                                                                                        | 1.Population chart <10 <sup>th</sup> percentile (Brenner)<br>2.Population chart <5 <sup>th</sup> percentile (Brenner) | Neonatal morbidity (one of more of: hypoglycaemia, respiratory distress, thrombocytopenia, hyperbilirubinaemia, intubation, sepsis, IVH, apnoea) (thresholds unreported) | 268     | 18  |
| Moser et al 2007 <sup>48</sup><br>UK       | Routine birth and death registration records, and NHS                                                                                                                                                                                                                                                                                            | Unreported                                                                                       | 1.Birth weight <2.5kg<br>2.Birth weight <1.5kg                                                                        | Neonatal death (up to 28 days)                                                                                                                                           | 590,430 | 546 |

|                                 |                                                                                                                                                                                                                                                                                                                                                                                                                                                           |            |                                                                 |                    |       |    |
|---------------------------------|-----------------------------------------------------------------------------------------------------------------------------------------------------------------------------------------------------------------------------------------------------------------------------------------------------------------------------------------------------------------------------------------------------------------------------------------------------------|------------|-----------------------------------------------------------------|--------------------|-------|----|
| North 1966 <sup>49</sup><br>USA | <p>Numbers for Babies data for babies born in England and Wales</p> <p>Year of Birth: 2005</p> <p>Mixed singleton/multiple birth</p> <p>Excluded if incomplete data</p> <p>Ethnicity unreported</p> <p>Deliveries at single maternity unit, infants weighing 1.0-2.5kg matched with infants 3.0-3.5kg.</p> <p>Year of birth 1957-1964</p> <p>Mixed singleton/multiple birth</p> <p>No exclusions specified</p> <p>Ethnicity: 75% White, 25% Non-white</p> | Unreported | Birth weight $\leq 2.5$ kg                                      | Neonatal death     | 2,676 | 26 |
| Ott 1995 <sup>50</sup><br>USA   | <p>Infants of a series of high risk obstetric patients referred to single perinatal centre.</p> <p>Year of birth: 1990-1991</p>                                                                                                                                                                                                                                                                                                                           | Unreported | Population chart $<10^{\text{th}}$ percentile (Ott and Hadlock) | Neonatal mortality | 957   | 2  |

|                                                 |                                                                                                                                                                                                                                                                                                                                 |                                                       |                                                                                 |                                                                                                                                                                                                                      |         |                        |
|-------------------------------------------------|---------------------------------------------------------------------------------------------------------------------------------------------------------------------------------------------------------------------------------------------------------------------------------------------------------------------------------|-------------------------------------------------------|---------------------------------------------------------------------------------|----------------------------------------------------------------------------------------------------------------------------------------------------------------------------------------------------------------------|---------|------------------------|
| Pulver et al<br>2009 <sup>51</sup><br>USA       | Unclear if singleton/<br>multiple birth<br>Congenital<br>anomalies excluded<br>Ethnicity unreported<br>Population study of<br>infants born in Utah,<br>linked birth and<br>death databases<br>Year of birth: 1999-<br>2005<br>Unclear if singleton/<br>mixed<br>Congenital<br>anomalies not<br>excluded<br>Ethnicity unreported | LMP, prenatal<br>USS and/or<br>newborn<br>examination | Population <10 <sup>th</sup><br>percentile (curves for<br>the study population) | Neonatal death (up to 28<br>days)                                                                                                                                                                                    | 316,077 | 239                    |
| Ullah et al<br>2009 <sup>52</sup><br>Bangladesh | Term newborns at a<br>single hospital,<br>stratified sampling<br>from three birth<br>weight strata ( $\leq 2$ , $>2$<br>to $<2.5$ and $\geq 2.5$ kg)<br>Year of birth:<br>unreported<br>Singleton<br>Included infants<br>defined as normal,<br>therefore anomalies<br>excluded<br>Ethnicity:<br>Bangladeshi                     | LMP                                                   | 1. Birth weight $<2.5$ kg<br>2. Birth weight $\leq 2$ kg                        | 1. Neonatal death (1 <sup>st</sup> 7<br>days)<br>2. Birth asphyxia (definition<br>not described)(1 <sup>st</sup> 7 days)<br>3. Acute respiratory<br>infection (definition not<br>described) (1 <sup>st</sup> 7 days) | 770     | 1. 7<br>2. 18<br>3. 17 |
| Walther and                                     | 500 consecutive live                                                                                                                                                                                                                                                                                                            | Dubowitz                                              | 1. Population chart                                                             | 1. Hypothermia (admission                                                                                                                                                                                            | 500     | 1. 38                  |

|                                                      |                                                                                                                                                                                                                                                                                                  |            |                                                                                                                                                     |                                                                                                                                                                                                            |      |       |
|------------------------------------------------------|--------------------------------------------------------------------------------------------------------------------------------------------------------------------------------------------------------------------------------------------------------------------------------------------------|------------|-----------------------------------------------------------------------------------------------------------------------------------------------------|------------------------------------------------------------------------------------------------------------------------------------------------------------------------------------------------------------|------|-------|
| Ramaekers<br>1982 <sup>9</sup><br>The<br>Netherlands | born infants<br>admitted to the<br>neonatal ward<br>directly after birth at<br>a single hospital.<br>Year of birth:<br>Unreported<br>Singleton<br>Congenital<br>anomalies,<br>chromosomal<br>anomalies, fetal<br>infections or<br>haemolytic disease<br>excluded.<br>Ethnicity: all<br>Caucasian | method     | <10th percentile<br>(Kloosterman grid)<br>2. Ponderal Index<br>(kg/m <sup>3</sup> ) <10 <sup>th</sup><br>percentile (Miller and<br>Hassanein chart) | rectal temp < 35.5<br>C)(neonatal)<br>2. Hypoglycaemia (≤<br>1.6mmol/L blood<br>glucose)(neonatal)                                                                                                         |      | 2. 18 |
| Wennergren<br>1986 <sup>53</sup><br>Sweden           | Unselected<br>population, all<br>infants born in<br>Goteburg<br>Year of birth:1978<br>Mixed singleton/<br>multiple births<br>Exclusions: missing<br>data<br>Ethnicity:<br>unreported                                                                                                             | Unreported | Birth weight ≥-2SD<br>below mean (standard<br>unreported)                                                                                           | Respiratory disorders<br>(Respiratory rate ≥ 60/ min<br>or <30/ min during first 3<br>hours; grunting/ chest wall<br>recessions at 2hrs age or<br>later; central cyanosis or<br>apnoeic spells) (neonatal) | 4415 | 234   |

|                                             |                                                                                                                                                                 |                           |                                                                                                 |                                        |         |     |
|---------------------------------------------|-----------------------------------------------------------------------------------------------------------------------------------------------------------------|---------------------------|-------------------------------------------------------------------------------------------------|----------------------------------------|---------|-----|
| Zhang et al<br>2007 <sup>34</sup><br>Sweden | Population based,<br>data from Swedish<br>birth registry<br>Year of birth 1992-<br>2001<br>Singleton<br>Exclusions: missing<br>data<br>Ethnicity: 87%<br>Nordic | USS 18 weeks<br>gestation | Population chart <10 <sup>th</sup><br>percentile (centiles<br>based on the study<br>population) | Early neonatal death (first 7<br>days) | 751,281 | 600 |
|---------------------------------------------|-----------------------------------------------------------------------------------------------------------------------------------------------------------------|---------------------------|-------------------------------------------------------------------------------------------------|----------------------------------------|---------|-----|

---

Kg=kilograms, USS= Ultrasound scan, LMP= Last menstrual period, mg/dL= milligrams per decilitre, SGA= small for gestational age, AGA= appropriate for gestational age, IUGR= intrauterine growth restricted, HIE= Hypoxic Ischaemic Encephalopathy, IVH- Intraventricular Haemorrhage, g/dL= grams per decilitre, SD=Standard deviation, PVL= Periventricular leukomalacia, EEG= electroencephalogram, NICU=Neonatal Intensive Care Unit, NEC= Necrotising enterocolitis, SCr= serum creatinine, µmol/L= micromoles per litre, CRL= crown rump length, BPD= biparietal diameter,
