# Supplementary material for: When is birthweight at term abnormally low? A systematic review and meta-analysis of the association and predictive ability of current birthweight standards for neonatal outcomes
Source: PubMed Central journal article supplement — BJOG. 2014 Jan 8;121(5):515–26. doi: 10.1111/1471-0528.12517 (PMC4162997; doi:10.1111/1471-0528.12517), 2014-01-08
Supplement: bjo0121-0515-SD2.pdf [file bjo0121-0515-SD2.pdf]

**Appendix S1: Protocol for systematic review and meta-analysis of the prognostic and predictive ability of current birth weight standards for short and long term outcomes.**

**Question**

Which measurement of fetal growth restriction most accurately predicts long term outcome?

**Population**

Inclusion: Infants who have had weight or other anthropometric measurements recorded at birth

Exclusion: infants who have low birth weight due to premature delivery but are appropriate for gestational age

**Index test**

Absolute weight (<2.5kg, <1.5kg, <1kg)

Birthweight <10<sup>th</sup> centile or <5<sup>th</sup> centile on population or customised growth charts

Ponderal index

Other measures of growth restriction as defined in the primary study

**Reference standard**

**Any reference standard looking at compromise of neonatal, childhood or adult wellbeing; including:**

Mortality

Cerebral palsy

Childhood or adult cognitive disability

Childhood or adult motor disability

Childhood or adult disease including diabetes mellitus, cardiovascular disease, hypertension

**Study design**

Test accuracy studies or epidemiology studies which consist of observational studies of defined populations in which the results of the test of interest are compared with the findings confirmed by a reference standard allowing generation of a 2x2 table to compute indices of test accuracy. Exclude: case series ≤ 10. If there are sufficient cohort studies, case-control studies may be excluded from the meta-analysis.
