# Supplementary material for: When is birthweight at term abnormally low? A systematic review and meta-analysis of the association and predictive ability of current birthweight standards for neonatal outcomes
Source: PubMed Central journal article supplement — BJOG. 2014 Jan 8;121(5):515–26. doi: 10.1111/1471-0528.12517 (PMC4162997; doi:10.1111/1471-0528.12517), 2014-01-08
Supplement: bjo0121-0515-SD3.pdf [file bjo0121-0515-SD3.pdf]

**Appendix S2: Medline search strategy for systematic review and meta-analysis of the prognostic and predictive ability of current birth weight standards for short and long term outcomes.**

1. Birth Weight/
2. birth weight.mp.
3. birth-weight.mp.
4. birthweight.mp.
5. Infant, Very Low Birth Weight/ or Infant, Low Birth Weight/
6. lbw.mp.
7. small-for-gestational-age.mp.
8. small for gestational age.mp.
9. small for date\*.mp.
10. small for gestation\*.mp.
11. sga.mp.
12. Infant, Small for Gestational Age/
13. intrauterine growth restrict\*.mp.
14. intrauterine growth retard\*.mp.
15. IUGR.mp.
16. Fetal Growth Retardation/
17. ponderal index.mp.
18. abdominal circumference.mp.
19. head circumference.mp.
20. exp body constitution/ or "body weights and measures"/
21. neonat\*.mp.
22. infant\*.mp.
23. newborn.mp.
24. 22 or 21 or 23
25. 11 or 7 or 2 or 1 or 16 or 13 or 6 or 3 or 9 or 12 or 14 or 15 or 8 or 4 or 10 or 5
26. 18 or 19 or 17 or 20
27. 24 and 26
28. 27 or 25
29. Diabetes Mellitus/

30. diabetes mellitus.mp.
31. Hypertension/ or hypertension.mp.
32. cardiovascular disease.mp. or Cardiovascular Diseases/
33. Metabolic Syndrome X/ or metabolic syndrome.mp.
34. cerebral palsy.mp. or Cerebral Palsy/
35. Developmental Disabilities/
36. developmental delay.mp.
37. learning difficulties.mp.
38. Learning Disorders/
39. neonatal morbidity.mp.
40. Infant Mortality/
41. neonatal mortality.mp.
42. infant mortality.mp.
43. 35 or 33 or 32 or 39 or 40 or 36 or 41 or 42 or 38 or 34 or 30 or 37 or 29 or 31
44. 28 and 43
45. limit 44 to humans
